# Supplementary material
Source: publisher site journal article supplement (https://www.dovepress.com/article/597894)
Supplement: Supplementary file 1 [file 597894%20Revised%20Supplementary%20Materials.docx]

**Table S1: Distribution of answers in the knowledge dimension**

| **Knowledge** | **N (%)** | | |
| --- | --- | --- | --- |
| **Yes** | **No** | **Unclear** |
| 1. **Do you understand the relevant knowledge of complete overdenture (dentures are a type of dental restoration device used to replace missing teeth)?** | 197(32.72) | 133(22.09) | 272(45.18) |
| 1. **Generally, complete overdentures refer to when all the teeth inside a patient's mouth are missing, and a set of dentures covering all the teeth is made through implantation or attachment. Is the above statement correct?** | 233(38.7) | 73(12.13) | 296(49.17) |
| 1. **Currently, complete overdentures are the main treatment option for patients with complete tooth loss, and they have a significant effect on restoring patients' oral function. However, traditional methods of complete overdenture restoration may have issues such as poor positioning or stability, and gradual loss of bone tissue around the implants, limiting their clinical application. Is the above statement correct?** | 237(39.37) | 56(9.3) | 309(51.33) |
| 1. **Complete overdenture refer to a type of complete overdentures where the denture base covers (to support and cover the gums or jawbone) and is supported by crowns or roots of teeth that have been treated. Is the above statement correct?** | 223(37.04) | 47(7.81) | 332(55.15) |
| 1. **Implant-supported dentures are connected to implants by attachments, which can enhance the stability and fixation of dentures, promoting the improvement of patients' chewing function and quality of life. Is the above statement correct?** | 283(47.01) | 29(4.82) | 290(48.17) |
| 1. **Complete overdentures are removable dentures used for tooth defects (when one or more teeth are missing in an entire row of teeth). They are suitable for cases with few remaining teeth, poor dental conditions (basic teeth are teeth that appear earliest in human growth and development, usually starting to grow in childhood and completing tooth growth and development in adolescence), and cannot be used directly as the abutment teeth for removable partial dentures. Is the above statement correct?** | 233(38.7) | 39(6.48) | 330(54.82) |
| 1. **Because there are roots under the base of the complete overdentures, it can reduce alveolar bone absorption, retain the periodontal membrane proprioceptor (mainly distributed in the periodontal ligament tissue, used to perceive and transmit various stimuli inside and outside the oral cavity), and increase the support, fixation, and stability of dentures. Is the above statement correct?** | 254(42.19) | 38(6.31) | 310(51.5) |
| 1. **Complete overdenture treatment is suitable for cases where there are few remaining teeth in the mouth and they cannot be used for fixed denture restoration, and when the condition of the abutment teeth is poor and cannot be used directly as the abutment teeth for removable dentures. Is the above statement correct?** | 221(36.71) | 51(8.47) | 330(54.82) |
| 1. **Which of the following situations is suitable for the use of complete overdentures (multiple choices allowed)?** |  |  |  |
| a. At least 1-2 teeth can be retained, and the position of these teeth is beneficial for the support, fixation, and stability of the dentures. | 388(64.45) |  |  |
| b. Oral hygiene is good, or good oral hygiene can be achieved through practice and learning, thereby delaying or preventing further decay or periodontal damage to the abutment teeth. | 361(59.97) |  |  |
| c. Due to severe alveolar bone resorption, xerostomia, sensitivity to oral foreign bodies, lack of learning ability, or psychological factors, it is estimated that wearing complete overdentures directly may not have good results. | 251(41.69) |  |  |
| d. Poor conditions of the remaining teeth, if other treatment methods are applied, the remaining teeth will suffer more severe damage. | 238(39.53) |  |  |
| e. Based on the cost-performance ratio and the final restoration effect of the dentures, when there are no other better treatment methods available. | 245(40.7) |  |  |
| 1. **Regarding the advantages of complete overdenture, the correct statements are (multiple choices allowed):** |  |  |  |
| a. Good stability, can be firmly connected by attachments, not easily dislodged while eating, does not move during speaking or chewing, provides firm fixation. | 469(77.91) |  |  |
| b. Maintains oral cleanliness, food debris in the oral cavity is not easily retained, facilitating maintenance and care, simple and convenient. | 380(63.12) |  |  |
| c. Distributes biting forces, allowing the dentures to receive effective support from hard tissues, increasing adhesion and reducing pressure pain, reducing foreign body sensation. | 308(51.16) |  |  |
| d. Good connection with the mucosa, effectively protecting the soft tissues in the oral cavity. | 277(46.01) |  |  |
| e. Increases the fullness of the alveolar bone, prevents disuse atrophy, easy to repair and adjust. | 280(46.51) |  |  |
| 1. **For elderly patients with complete tooth loss, complete overdenture can reduce alveolar ridge absorption, ensuring the richness and height of the alveolar ridge, resulting in better outcomes compared to complete overdentures. Is the above statement correct?** | 300(49.83) | 27(4.49) | 275(45.68) |
| 1. **After completing covered denture restoration, attention should be paid to dietary management, avoiding spicy and irritating foods. Is the above statement correct?** | 312(51.83) | 50(8.31) | 240(39.87) |
| 1. **Compared to complete overdenture restoration for tooth loss, implant-supported dentures have ideal short-term fixation effects, lower alveolar ridge absorption, and can significantly improve patients' quality of life and satisfaction. Is the above statement correct?** | 300(49.83) | 33(5.48) | 269(44.68) |

**Table S2: Distribution of answers in the attitude dimension**

| **Attitude** | **Strongly agree** | **Agree** | **Neutral** | **Disagree** | **Strongly disagree** |
| --- | --- | --- | --- | --- | --- |
| 1. **Do you agree that the state of complete tooth loss would affect your daily life?** | 238(39.53) | 148(24.58) | 152(25.25) | 29(4.82) | 35(5.81) |
| 1. **Faced with the condition of complete tooth loss, are you willing to seek some medical help within the scope of your financial means?** | 213(35.38) | 211(35.05) | 143(23.75) | 12(1.99) | 23(3.82) |
| 1. **When choosing dentures, is cost your primary consideration?** | 248(41.2) | 192(31.89) | 125(20.76) | 23(3.82) | 14(2.33) |
| 1. **Are you willing to choose full-coverage denture restoration?** | 188(31.23) | 234(38.87) | 144(23.92) | 21(3.49) | 15(2.49) |
| 1. **Do you agree that medical insurance policies would affect your choice regarding full-coverage denture restoration (if full-coverage denture restoration is covered by medical insurance, would you be more willing to choose complete overdenture)?** | 214(35.55) | 179(29.73) | 177(29.4) | 17(2.82) | 15(2.49) |
| 1. **Do you agree that complete overdenture have better outcomes compared to traditional complete overdentures?** | 194(32.23) | 179(29.73) | 197(32.72) | 16(2.66) | 16(2.66) |
| 1. **Would you choose traditional complete overdentures with relatively lower prices, sacrificing quality of life, or would you choose complete overdenture or implant-supported dentures with relatively higher prices to improve quality of life?** |  |  |  |  |  |
| a. Traditional complete overdentures | 183(30.4) |  |  |  |  |
| b. Complete overdenture | 189(31.4) |  |  |  |  |
| c. Implant-supported complete overdenture | 154(25.58) |  |  |  |  |
| These are all choices | 76(12.634.82) |  |  |  |  |
| 1. **What factors do you think are related to the lifespan of complete overdenture (utilizing natural tooth roots) or implant-supported dentures? (multiple choices allowed)** |  |  |  |  |  |
| a. Smoking | 364(60.47) |  |  |  |  |
| b. Alcohol consumption | 300(49.83) |  |  |  |  |
| c. Poor oral hygiene | 443(73.59) |  |  |  |  |
| d. Systemic diseases (diabetes, etc.) | 290(48.17) |  |  |  |  |
| e. Periodontal disease | 350(58.14) |  |  |  |  |

**Table S3: Distribution of answers in the practice dimension**

| **Practice** | **Always** | **Often** | **Sometimes** | **Rarely** | **Never** |
| --- | --- | --- | --- | --- | --- |
| 1. **Are you willing to receive popular science education related to complete overdenture?** | 172(28.57) | 248(41.2) | 154(25.58) | 16(2.66) | 12(1.99) |
| 1. **Are you willing to proactively communicate with your attending dentist about relevant treatment strategies and precautions regarding dentures?** | 159(26.41) | 257(42.69) | 164(27.24) | 12(1.99) | 10(1.66) |
| 1. **Are you willing to understand and compare the advantages and disadvantages of different types of dentures through different channels, and choose a suitable denture treatment plan after comprehensive consideration?** | 150(24.92) | 259(43.02) | 164(27.24) | 18(2.99) | 11(1.83) |
| 1. **Are you willing to fully accept treatment with full-coverage denture restoration?** | 139(23.09) | 235(39.04) | 198(32.89) | 20(3.32) | 10(1.66) |
|  | **a. Yes, I will strictly adhere** | **b. I will consider** | **c. Depends on the situation** | **d. No, I have my own habits** | **e. Not at all** |
| 1. **After receiving treatment with full-coverage denture restoration, will you maintain oral hygiene and adjust chewing and dietary habits according to medical advice?** | 343(56.98) | 135(22.43) | 104(17.28) | 11(1.83) | 9(1.5) |
| 1. **After receiving treatment with full-coverage denture restoration, will you adhere to regular follow-up appointments as per medical advice?** | 357(59.3) | 130(21.59) | 101(16.78) | 5(0.83) | 9(1.5) |

# Table S4: Univariate and multivariate logistic regression analysis of factors associated with Knowledge scores

| **Knowledge** | **Univariate Analysis** | | **Multivariate Analysis** | |
| --- | --- | --- | --- | --- |
| **OR (95%CI)** | **P** | **OR (95%CI)** | **P** |
| **Age (years)** |  |  |  |  |
| 45 ~ 55 years old | Reference |  | Reference |  |
| 55 ~ 65 years old | 0.85(0.59,1.23) | 0.413 | 0.53(0.34,0.83) | **0.006** |
| ＞66 years old | 0.65(0.42,1.01) | 0.057 | 0.50(0.30,0.84) | **0.009** |
| **Gender** |  |  |  |  |
| Male | Reference |  | Reference |  |
| Female | 1.85(1.34,2.57) | **<0.001** | 1.52(1.05,2.20) | **0.023** |
| **Education** |  |  |  |  |
| a. High school and below | 0.81(0.42,1.57) | 0.537 |  |  |
| b. College degree | 0.99(0.51,1.94) | 0.998 |  |  |
| c. Bachelor's degree | 1.36(0.67,2.77) | 0.382 |  |  |
| d. Master's degree or above | Reference | Reference |  |  |
| **Your residence:** |  |  |  |  |
| 1. Urban | Reference |  | Reference |  |
| b. Rural | 0.56(0.36,0.89) | **0.014** | 0.68(0.40,1.13) | 0.143 |
| **Do you have any missing teeth (naturally lost or extracted due to toothache/tooth decay/trauma, etc.)?** |  |  |  |  |
| Yes | Reference |  | Reference |  |
| No | 0.59(0.42,0.83) | **0.003** | 0.85(0.55,1.30) | 0.467 |
| **Have you heard of complete overdenture?** |  |  |  |  |
| Yes, and I am very familiar with them | Reference |  | Reference |  |
| Yes, I have only heard of them | 0.22(0.14,0.35) | **<0.001** | 0.26(0.15,0.43) | **<0.001** |
| No, but I have heard of dentures | 0.18(0.10,0.32) | **<0.001** | 0.23(0.12,0.43) | **<0.001** |
| No, I have not heard of them at all | 0.08(0.04,0.14) | **<0.001** | 0.12(0.06,0.23) | **<0.001** |
| **Have you ever had dentures installed?** |  |  |  |  |
| Yes, and I have complete overdenture | Reference |  | Reference |  |
| Yes, I have had dentures installed, but not complete overdenture | 0.58(0.35,0.97) | **0.038** | 0.89(0.50,1.57) | 0.694 |
| No | 0.25(0.16,0.38) | **<0.001** | 0.44(0.25,0.74) | **0.002** |

Bold values indicate statistical significance at P < 0.05.

# Table S5: Univariate and multivariate logistic regression analysis of factors associated with Attitude scores

| **Attitude** | **Univariate Analysis** | | **Multivariate Analysis** | |
| --- | --- | --- | --- | --- |
| **OR (95%CI)** | **P** | **OR (95%CI)** | **P** |
| **Knowledge score** | 1.25(1.20,1.30) | **<0.001** | 1.24(1.19,1.30) | **<0.001** |
| **Age (years)** |  |  |  |  |
| 45 ~ 55 years old | Reference |  |  |  |
| 55 ~ 65 years old | 0.97(0.67,1.39) | 0.876 |  |  |
| ＞66 years old | 0.81(0.53,1.26) | 0.367 |  |  |
| **Gender** |  |  |  |  |
| Male | Reference |  | Reference |  |
| Female | 1.59(1.15,2.20) | **0.004** | 1.38(0.93,2.03) | 0.1 |
| **Education** |  |  |  |  |
| a. High school and below | 1.15(0.59,2.23) | 0.676 | 1.24(0.54,2.82) | 0.605 |
| b. College degree | 1.28(0.65,2.50) | 0.465 | 1.35(0.59,3.06) | 0.471 |
| c. Bachelor's degree | 2.04(1.00,4.16) | **0.05** | 1.92(0.80,4.59) | 0.142 |
| d. Master's degree or above | Reference |  | Reference |  |
| **Your residence:** |  |  |  |  |
| 1. Urban | Reference |  | Reference |  |
| b. Rural | 0.45(0.28,0.70) | **0.001** | 0.65(0.38,1.13) | 0.13 |
| **Do you have any missing teeth (naturally lost or extracted due to toothache/tooth decay/trauma, etc.)?** |  |  |  |  |
| Yes | Reference |  | Reference |  |
| No | 0.55(0.39,0.77) | **0.001** | 0.71(0.45,1.10) | 0.133 |
| **Have you heard of complete overdenture?** |  |  |  |  |
| Yes, and I am very familiar with them | Reference |  | Reference |  |
| Yes, I have only heard of them | 0.42(0.27,0.64) | **<0.001** | 0.91(0.52,1.58) | 0.752 |
| No, but I have heard of dentures | 0.25(0.14,0.44) | **<0.001** | 0.64(0.32,1.26) | 0.201 |
| No, I have not heard of them at all | 0.38(0.23,0.62) | **<0.001** | 1.94(1.00,3.77) | **0.047** |
| **Have you ever had dentures installed?** |  |  |  |  |
| Yes, and I have complete overdenture | Reference |  | Reference |  |
| Yes, I have had dentures installed, but not complete overdenture | 0.73(0.44,1.21) | 0.23 | 0.94(0.51,1.71) | 0.851 |
| No | 0.33(0.22,0.52) | **<0.001** | 0.59(0.34,1.02) | 0.062 |

Bold values indicate statistical significance at P < 0.05.

# Table S6: Univariate and multivariate logistic regression analysis of factors associated with Practice scores

| **Practice** | **Univariate Analysis** | | **Multivariate Analysis** | |
| --- | --- | --- | --- | --- |
| **OR (95%CI)** | **P** | **OR (95%CI)** | **P** |
| **Knowledge score** | 1.20(1.15,1.25) | **<0.001** | 1.04(0.99,1.10) | 0.074 |
| **Attitude score** | 1.48(1.39,1.58) | **<0.001** | 1.42(1.32,1.53) | **<0.001** |
| **Age (years)** |  |  |  |  |
| 45 ~ 55 years old | Reference |  | Reference |  |
| 55 ~ 65 years old | 0.72(0.50,1.04) | 0.089 | 0.62(0.37,1.02) | 0.063 |
| ＞66 years old | 0.67(0.43,1.04) | 0.075 | 0.80(0.45,1.44) | 0.472 |
| **Gender** |  |  |  |  |
| Male | Reference |  | Reference |  |
| Female | 1.28(0.93,1.76) | 0.127 |  |  |
| **Education** |  |  |  |  |
| a. High school and below | 1.09(0.56,2.12) | 0.791 |  |  |
| b. College degree | 1.30(0.67,2.55) | 0.431 |  |  |
| c. Bachelor's degree | 1.5(0.73,3.04) | 0.263 |  |  |
| d. Master's degree or above | Reference |  |  |  |
| **Your residence:** |  |  |  |  |
| a. Urban | 0.46(0.29,0.73) | **0.001** | 0.70(0.38,1.29) | 0.264 |
| b. Rural | Reference |  | Reference |  |
| **Do you have any missing teeth (naturally lost or extracted due to toothache/tooth decay/trauma, etc.)?** |  |  |  |  |
| Yes | 0.67(0.48,0.94) | **0.023** | 1.03(0.62,1.70) | 0.905 |
| No | Reference |  | Reference |  |
| **Have you heard of complete overdenture?** |  |  |  |  |
| Yes, and I am very familiar with them | 0.23(0.14,0.36) | **<0.001** | 0.31(0.17,0.57) | **<0.001** |
| Yes, I have only heard of them | 0.22(0.12,0.39) | **<0.001** | 0.38(0.17,0.81) | **0.012** |
| No, but I have heard of dentures | 0.20(0.12,0.33) | **<0.001** | 0.28(0.13,0.58) | **0.001** |
| No, I have not heard of them at all | Reference |  | Reference |  |
| **Have you ever had dentures installed?** |  |  |  |  |
| Yes, and I have complete overdenture | Reference |  | Reference |  |
| Yes, I have had dentures installed, but not complete overdenture | 0.66(0.40,1.09) | 0.108 | 1.08(0.55,2.12) | 0.806 |
| No | 0.39(0.25,0.60) | **<0.001** | 0.92(0.48,1.73) | 0.801 |

Bold values indicate statistical significance at P < 0.05.

**Supplementary Questionnaire 1**

| Questionnaire Number: Dear Friend,  We are researchers from the People’s Hospital of Changzhi City, Shanxi Province, and we sincerely invite you to participate in our research project. This study aims to assess the knowledge, attitudes, and practices of middle-aged and elderly individuals regarding complete dentures, providing a foundation for developing scientifically informed early intervention strategies. These findings may help more individuals in the future and improve patient health outcomes. Participation in this study is voluntary. If you agree to participate, please read the following instructions.  1. Please complete the questionnaire. There are no right or wrong answers. You only need to respond based on your actual situation. You may ask us questions at any time during the process. Please submit the questionnaire after completing it.  2. This study involves a simple questionnaire survey and will not cause any physical or psychological harm. The questionnaire includes some personal information such as gender and age. We will strictly protect your privacy and will not disclose your information. Please feel confident in completing it.  3. As a participant, you may request information about the study and its progress at any time. If you decide to withdraw from the study, please inform us. Your data will not be included in the research results.  Finally, we sincerely thank you for taking the time to support our research despite your busy schedule.  □ I understand and agree to the use of the collected data for scientific research.  Informed Consent Signature:  Date of Participation: Year Month Day |
| --- |

| **Section One: Basic Information** | | | | | | | | | | | | | |
| --- | --- | --- | --- | --- | --- | --- | --- | --- | --- | --- | --- | --- | --- |
| 1. Your age： | a. 45 to 55 years  b. 55 to 65 years  c. Over 66 years | | | | | | | | | | | | |
| 1. Your gender: | a. Male  b. Female | | | | | | | | | | | | |
| 1. Your education level: | a. High school or below  b. College diploma  c. Bachelor's degree  d. Master's degree or above | | | | | | | | | | | | |
| 1. Your current or previous employment situation (multiple selections allowed): | a. Retired  b. Healthcare or related industry worker  c. Manual laborer  d. Worker in other industries | | | | | | | | | | | | |
| 1. Your place of residence: | a. Urban  b. Rural | | | | | | | | | | | | |
| 1. Do you have any missing teeth (due to natural loss, toothache, cavities, trauma, etc.)? | a. Yes  b. No | | | | | | | | | | | | |
| 1. Have you heard of complete dentures? | a. Yes, and I am very knowledgeable about it  b. Yes, I have only heard of it  c. No, but I have heard of dentures  d. No, I have not heard of it at all | | | | | | | | | | | | |
| 1. Have you ever had dentures fitted? | a. Yes, and I have complete dentures  b. Yes, I have had dentures, but not complete dentures  c. No | | | | | | | | | | | | |
| **Section Two: Understanding of Complete Dentures** | | | | | | | | | | | | |
| 1. Do you have knowledge regarding complete dentures (dentures are dental prosthetic devices used to replace missing teeth)? | | | a. Yes | | b. No | | | | | | | c. Unclear |
| 2. Complete dentures generally refer to a prosthesis that replaces all missing teeth in a patient's mouth, which can be achieved through implant or adhesive methods. Is the above statement correct? | | | a. Yes | | b. No | | | | | | | c. Unclear |
| 3. Complete dentures are currently the primary treatment option for edentulous patients, demonstrating significant effects in restoring oral function. However, traditional complete denture techniques may experience issues with positioning or stability, as well as progressive resorption or loss of surrounding bone tissue, which limits their clinical application. Is the above statement correct? | | | a. Yes | | b. No | | | | | | | c. Unclear |
| 4. Complete dentures refer to prostheses with a base that covers and supports the gums or alveolar ridge, as well as providing support for treated crowns or roots. Is the above statement correct? | | | a. Yes | | b. No | | | | | | | c. Unclear |
| 5. Implant-supported dentures connect the implant and the denture via attachments, which can enhance the retention and stability of the denture, thereby improving the patient's chewing function and quality of life. Is the above statement correct? | | | a. Yes | | b. No | | | | | | | c. Unclear |
| 6. Overlay dentures are removable prostheses designed for situations where there are one or more missing teeth in an arch. They are suitable when remaining teeth are few and the periodontal conditions of abutment teeth (the first teeth to emerge during human development, typically erupting in childhood and completing growth in adolescence) are poor, preventing their use as direct supports for removable partial dentures. Is the above statement correct? | | | a. Yes | | b. No | | | | | | | c. Unclear |
| 7. Due to the presence of roots beneath the base of overlay dentures, alveolar bone resorption can be reduced, preserving the periodontal mechanoreceptors (primarily located within the periodontal tissue, used for sensing and transmitting various stimuli from inside and outside the oral cavity). This can increase the support, retention, and stability of the denture. Is the above statement correct? | | | a. Yes | | b. No | | | | | | | c. Unclear |
| 8. Overlay denture treatment is suitable for situations where there are few remaining teeth in the oral cavity that cannot support fixed prosthetic restoration, and where the conditions of abutment teeth are poor and cannot be directly used as supports for removable dentures. Is the above statement correct? | | | a. Yes | | b. No | | | | | | | c. Unclear |
| 9. Which of the following situations are applicable for the use of overlay dentures (multiple selections allowed)? | | | a. At least 1-2 teeth can be preserved, and their position is beneficial for the support, retention, and stability of the dentures;  b. The oral hygiene status is good, or can be achieved through practice and learning, which can delay or prevent further caries or periodontal damage to the abutment teeth;  c. Due to severe alveolar ridge resorption, xerostomia, sensitivity to oral foreign bodies, lack of learning ability, or psychological factors, it is estimated that the direct use of complete dentures will be ineffective;  d. The condition of remaining teeth is poor, and if other treatment methods are applied, the remaining teeth may suffer more severe damage;  e. When there are no better restorative treatment options available in terms of cost-effectiveness and the final restoration outcome of the dentures; | | | | | | | | | |
| 10. Regarding the advantages of complete dentures, which of the following statements are correct (multiple selections allowed)? | | | a. Good stability can be achieved through attachments that connect the teeth securely, making them less likely to become dislodged during eating, and preventing movement during speaking or chewing;  b. Maintaining oral cleanliness, as food residues are less likely to remain in the oral cavity, facilitating maintenance and care, which is simple and convenient;  c. Distributing occlusal forces effectively, allowing the dentures to receive adequate support from hard tissue, increasing adhesion, reducing pressure discomfort, and minimising the sensation of foreign objects;  d. Better integration with the mucosa, effectively protecting the soft tissues within the oral cavity;  e. Increasing the fullness of the alveolar bone, preventing disuse atrophy, and facilitating repair and adjustment. | | | | | | | | | |
| 11. For elderly edentulous patients, complete dentures can reduce alveolar ridge resorption (the bony ridges in the upper (maxilla) and lower (mandible) jaws that support teeth), thereby ensuring greater richness and height of the alveolar ridge, which is superior to complete dentures. Is the above statement correct? | | | a. Yes | | | b. No | | | | c. Unclear | | |
| 12. After receiving overlay denture restoration, dietary management is important; spicy or irritating foods should be avoided. Is the above statement correct? | | | a. Yes | | | b. No | | | | c. Unclear | | |
| 13. Compared to complete dentures for replacing missing teeth, implant-supported dentures provide ideal short-term retention, lower alveolar ridge resorption, and significantly enhance the patient's quality of life and satisfaction. Is the above statement correct? | | | a. Yes | | | b. No | | | | c. Unclear | | |
| **Section Three: Attitudes Towards Complete Dentures** | | | | | | | | | | | | |
| 1. Do you agree that complete tooth loss affects your daily life? | | a.Strongly Agree | | b.Agree | | | | c.Neutral | d.Disagree | | e.Strongly Disagree | |
| 1. In the face of complete tooth loss, are you willing to seek medical assistance within your financial means? | | a.Strongly Agree | | b.Agree | | | | c.Neutral | d.Disagree | | e.Strongly Disagree | |
| 1. When choosing dentures, is cost your primary consideration? | | a. Yes, it is a decisive factor.  b. Yes, but I will also consider other factors.  c. Generally.  d. No impact.  e. No impact at all. | | | | | | | | | | |
| 1. Are you willing to opt for complete removable dentures? | | a.Strongly Agree | | b.Agree | | | c.Neutral | | d.Disagree | | e.Strongly Disagree | |
| 1. Do you agree that health insurance policies influence your choice regarding complete removable dentures (if complete removable dentures were covered by health insurance, would you be more inclined to choose them)? | | a.Strongly Agree | | b.Agree | | | c.Neutral | | d.Disagree | | e.Strongly Disagree | |
| 1. Do you agree that complete removable dentures provide better outcomes than traditional complete dentures? | | a.Strongly Agree | | b.Agree | | | c.Neutral | | d.Disagree | | e.Strongly Disagree | |
| 1. Would you prefer to choose the relatively inexpensive traditional complete dentures, which may reduce your quality of life, or the more expensive complete removable dentures or implant-supported dentures, which may enhance your quality of life? | | a. Traditional complete dentures  b. Complete removable dentures  c. Implant-supported complete dentures | | | | | | | | | | |
| 1. Which factors do you believe are related to the lifespan of complete removable dentures (utilising natural tooth roots) or implant-supported dentures? (Multiple selections are allowed) | | a . Smoking  b. Alcohol consumption  c. Poor oral hygiene  d. Systemic diseases (e.g., diabetes)  e. Periodontal disease  f. Unhealthy lifestyle habits  g. Doctor's skills | | | | | | | | | | |

| **Section Four: Practices Regarding Complete Dentures** | | | | | |
| --- | --- | --- | --- | --- | --- |
| 1. Are you willing to receive information related to complete removable dentures? | a.Strongly willing | b. Willing | c. Neutral | d. Unwilling | e.Strongly unwilling |
| 1. Are you willing to proactively communicate with your attending dentist regarding treatment strategies and precautions related to dentures? | a.Strongly willing | b. Willing | c. Neutral | d. Unwilling | e.Strongly unwilling |
| 1. Are you willing to explore and compare the advantages and disadvantages of different dentures through various channels, and subsequently choose a suitable denture treatment plan? | a.Strongly willing | b. Willing | c. Neutral | d. Unwilling | e.Strongly unwilling |
| 1. Are you willing to fully accept treatment involving complete removable dentures? | a.Strongly willing | b. Willing | c. Neutral | d. Unwilling | e.Strongly unwilling |
| 1. After receiving treatment for complete removable dentures, will you follow medical advice to maintain oral hygiene and adjust your chewing and dietary habits accordingly? | a. Yes, I will strictly comply.  b. I will refer to it.  c. It depends on the situation.  d. No, I have my own habits.  e. Absolutely not. | | | | |
| 1. After receiving treatment for complete removable dentures, will you adhere to medical advice for regular follow-up appointments? | a. Yes, I will strictly comply.  b. I will consider it.  c. It depends on the situation.  d. No, I don't have the time and do not wish to go.  e. Absolutely not; I believe the treatment is very effective and does not require follow-up. | | | | |
